# Supplementary material for: Posttranslationally modified progesterone receptors direct ligand-specific expression of breast cancer stem cell-associated gene programs
Source: Springer Nature journal article supplement (doi:10.1186/s13045-017-0462-7), 2017-04-17

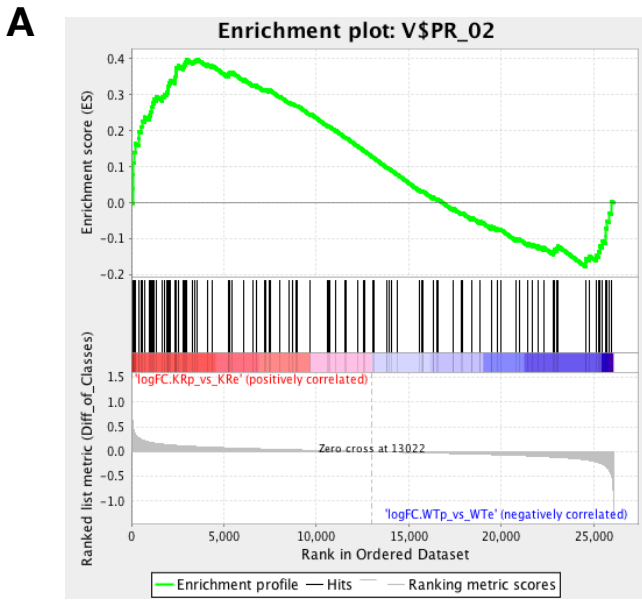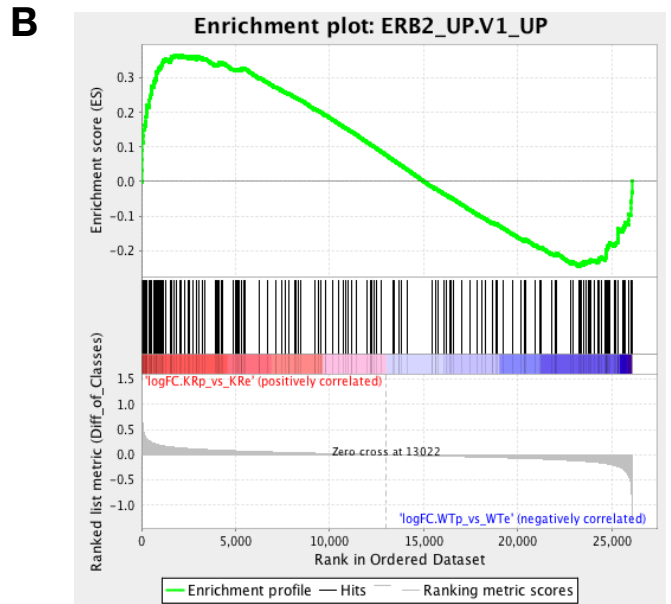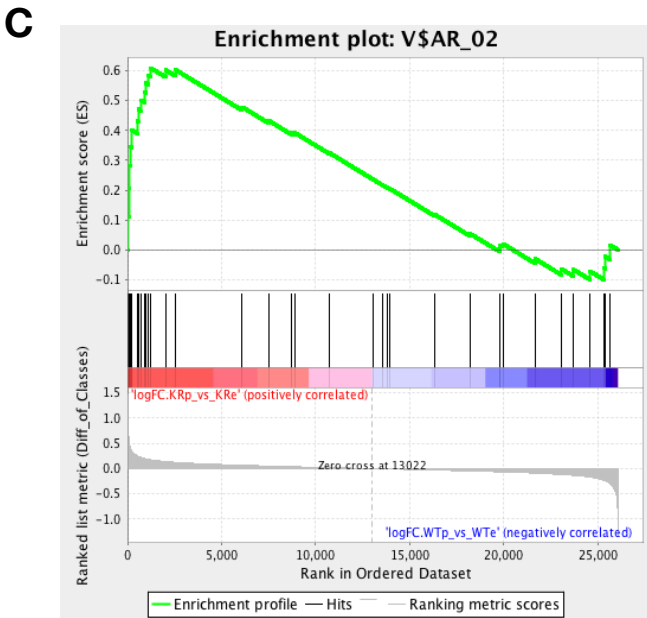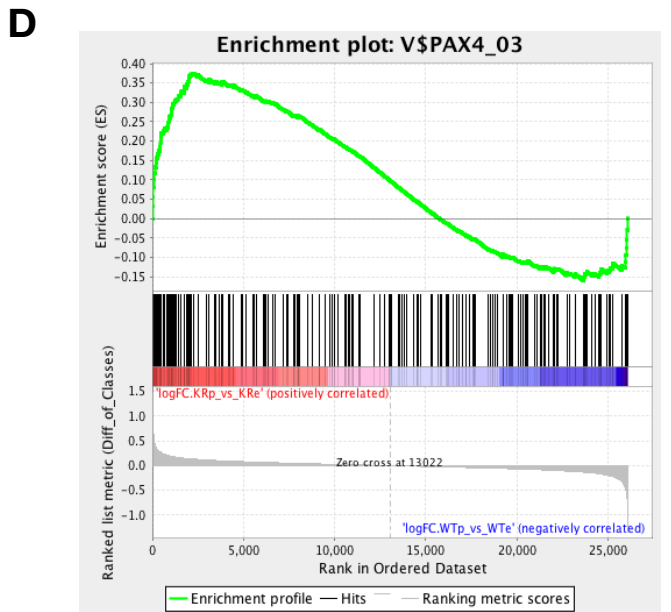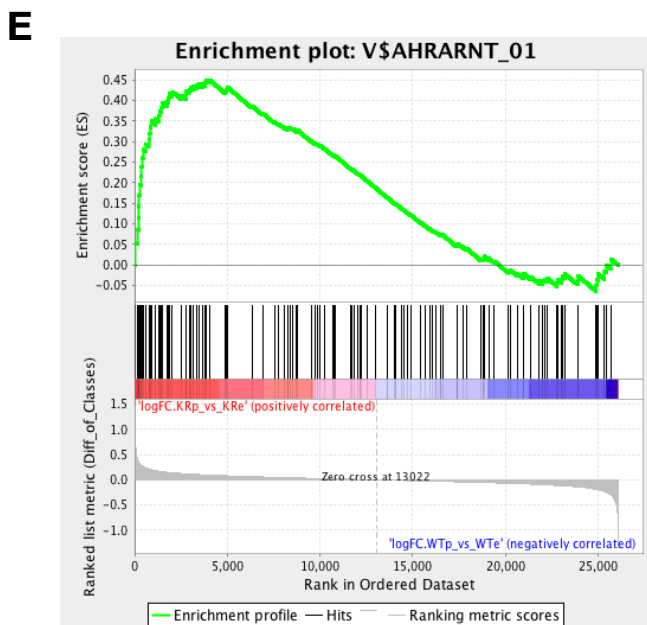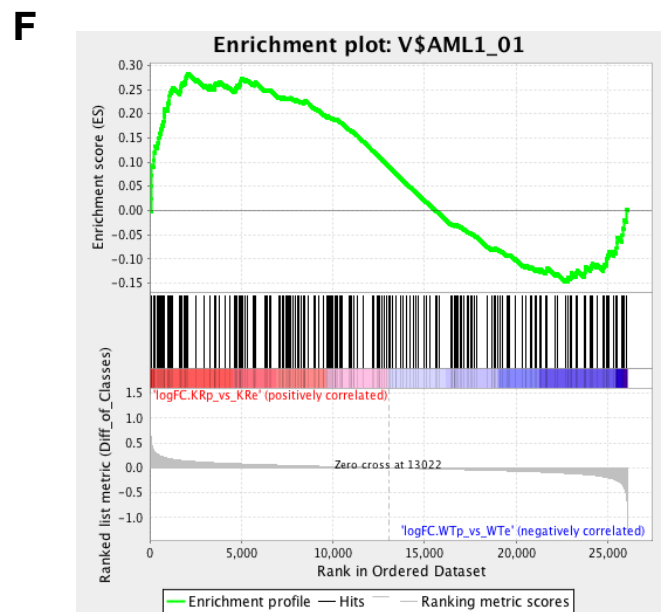

Supplement: MOESM3 [file 12224224]
